# Supplementary material for: LncRNA Taurine-Upregulated Gene 1 Promotes Cell Proliferation by Inhibiting MicroRNA-9 in MCF-7 Cells
Source: PubMed Central journal article supplement — J Breast Cancer. 2016 Dec 23;19(4):349–57. doi: 10.4048/jbc.2016.19.4.349 (PMC5204041; doi:10.4048/jbc.2016.19.4.349), 2016-12-23
Supplement: jbc-19-349-s002.pdf [file jbc-19-349-s002.pdf]

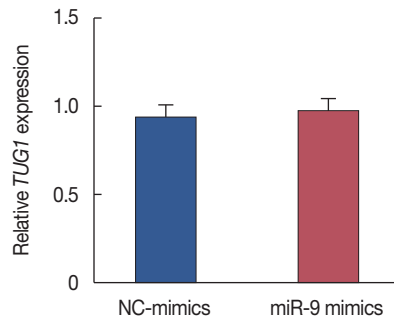

**Supplementary Figure 2.** The effect of miR-9 mimics on the level of TUG1 in MDA-MB-231 cells. Data represent mean ± SD (n=6, each). NC= negative control.
